# Supplementary material for: Thermal migration towards constructing W-W dual-sites for boosted alkaline hydrogen evolution reaction
Source: PubMed Central journal article supplement (PMC8828749; doi:10.1038/s41467-022-28413-6), 2022-02-09
Supplement: 41467_2022_28413_MOESM3_ESM.pdf [file 41467_2022_28413_MOESM3_ESM.pdf]

## Description of Additional Supplementary Files

File name: Supplementary Movie 1

Description: The Supplementary Movie shows the generation and detachment of H<sub>2</sub> bubbles under the increasing overpotentials.
